# Supplementary material for: Metabolite Shifts Induced by Marathon Race Competition Differ between Athletes Based on Level of Fitness and Performance: A Substudy of the Enzy-MagIC Study
Source: MDPI journal article supplement (doi:10.3390/metabo10030087), 2020-03-01
Supplement: s1 [file s1]

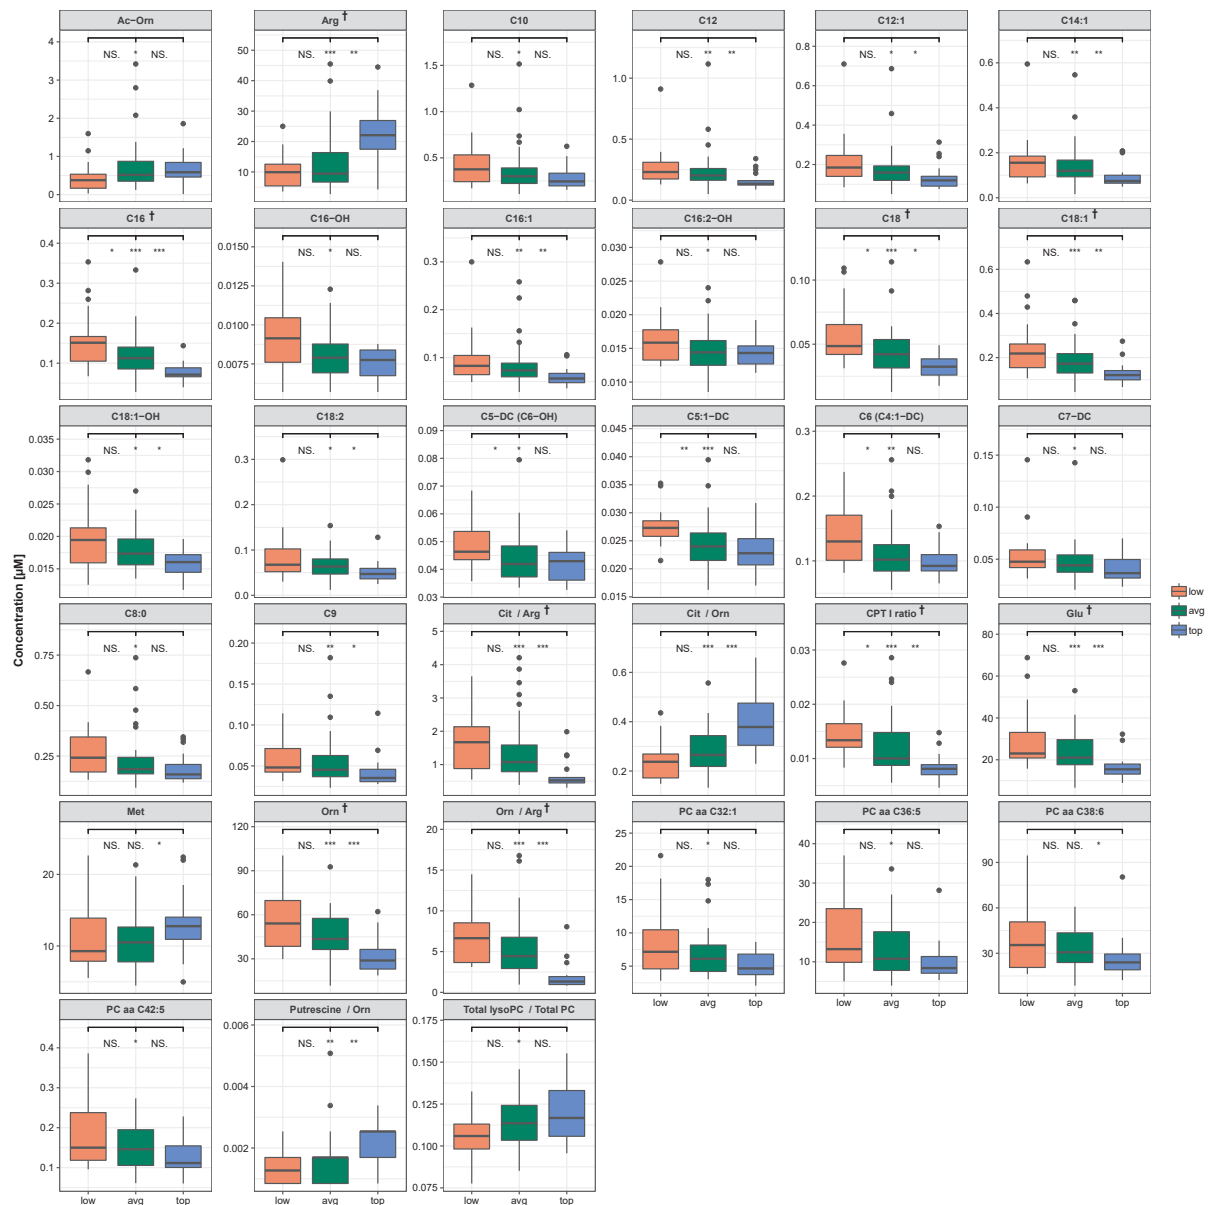

Figure S3A: Metabolite concentrations with regard to the different cohorts. Thirty-three metabolites with significant differences ( $p < 0.05$ ) between performer classes. Metabolites/ratios with  $q$ -values  $< 0.05$  are denoted as †. 19 metabolites/ratios belong to acylcarnitines, 8 can be attributed to the arginine metabolism. \*  $p < 0.05$ , \*\*  $p < 0.01$ , \*\*\*  $p < 0.001$ , NS. Non-significant. Significant differences regarding absolute values at T3 (immediately after the race). Asterisks on the left side denote a significant difference between low and average performers, asterisks in the middle denote a significant difference between low and top performers, and asterisks on the right side denote a significant difference between average and top performers.
