# Supplementary material for: Metabolite Shifts Induced by Marathon Race Competition Differ between Athletes Based on Level of Fitness and Performance: A Substudy of the Enzy-MagIC Study
Source: MDPI journal article supplement (doi:10.3390/metabo10030087), 2020-03-01
Supplement: s1 [file s1]

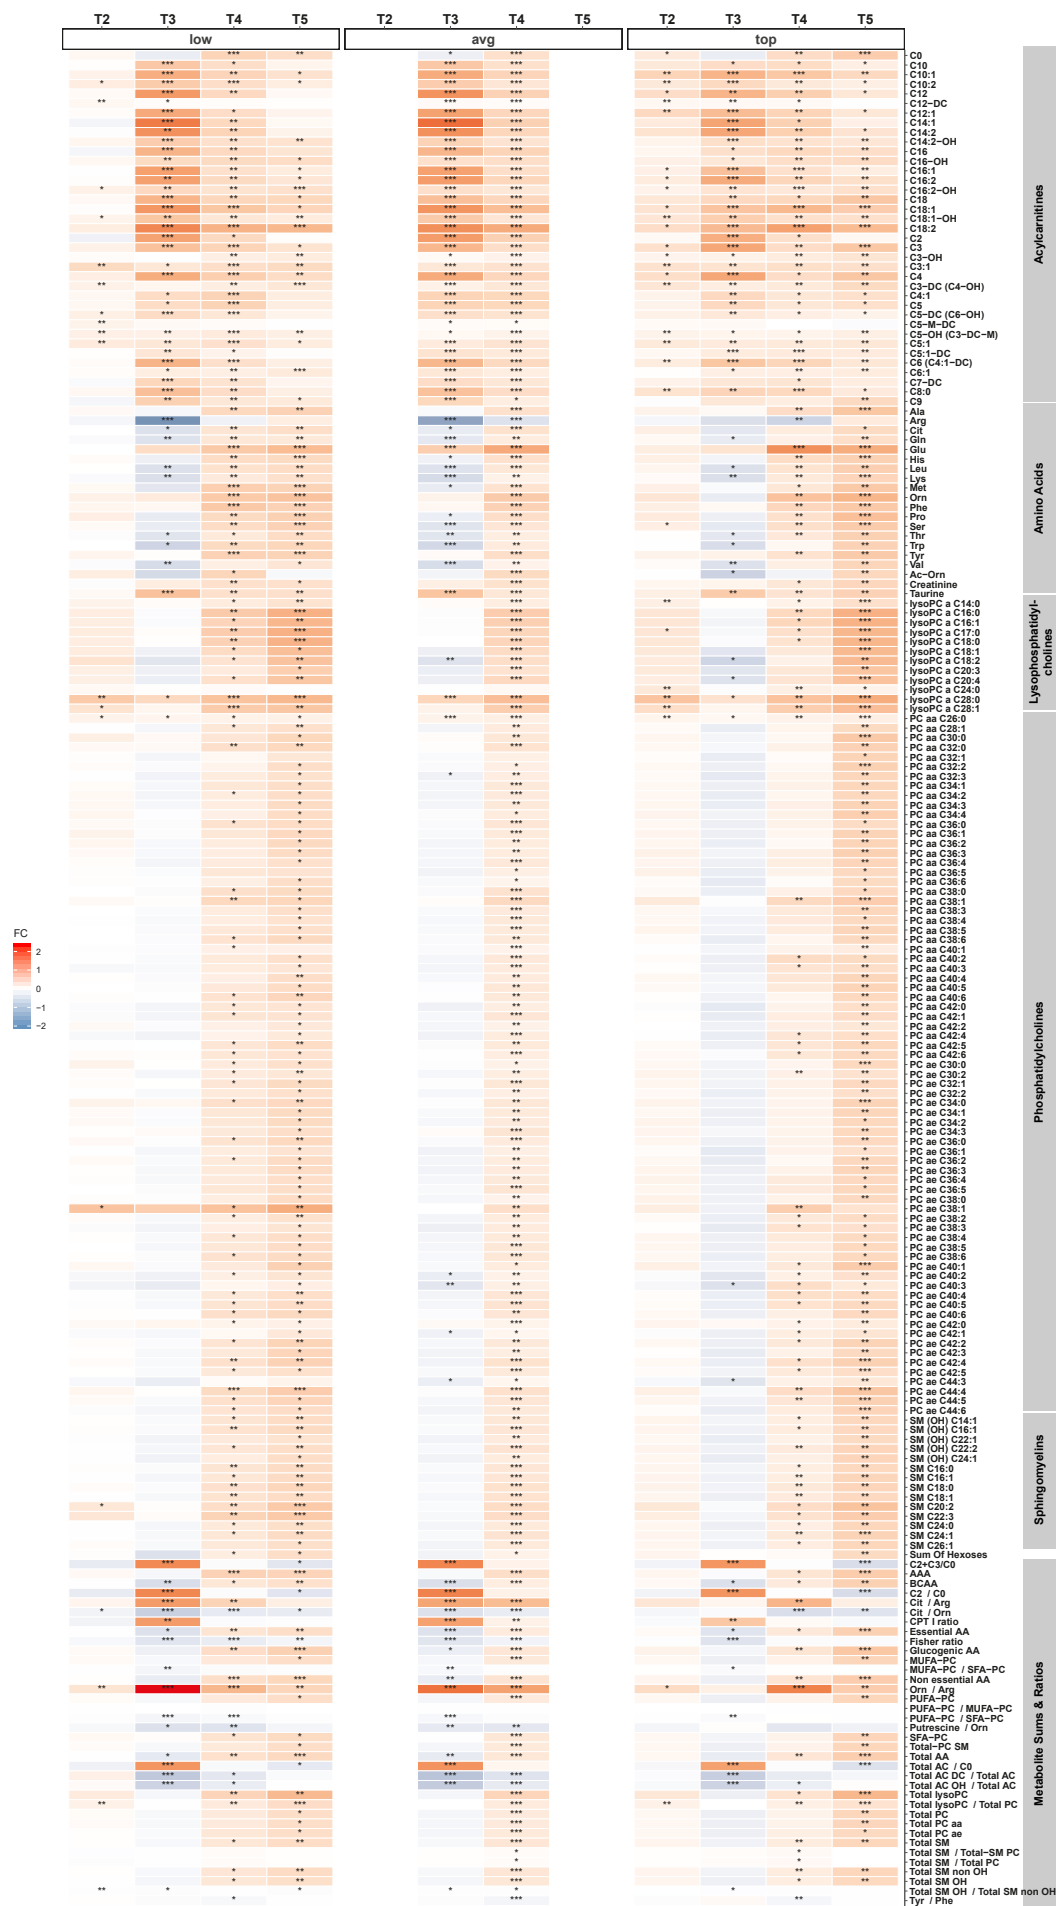

Figure S2: Performer class specific log<sub>2</sub>-fold changes referenced to time point 1. \*  $p < 0.05$ , \*\*  $p < 0.01$ , \*\*\*  $p < 0.001$ , Quantification of 188 metabolites including acylcarnitines, amino acids, biogenic amines, hexoses, phospholipids (lysophosphatidylcholines, phosphatidylcholines), sphingolipids (sphingomyelins), and metabolite sums and ratios. Groups included top ( $n = 20$ , top performers, TP), average ( $n = 40$ , average performers, AP), and low ( $n = 20$ , low performers, LP) performers based on endurance capacity (relative VO<sub>2</sub>max) and net marathon finishing time. Blood samples were collected at time points T1 (training phase), T2 (tapering phase), T3 (immediately after the race), T4 (24 h post-race), and T5 (72 h post-race). All blood samples were measured for the TP and LP groups, with T1, T3, and T4 measured for the AP group.
