# Supplementary figures and images for: Metabolite Shifts Induced by Marathon Race Competition Differ between Athletes Based on Level of Fitness and Performance: A Substudy of the Enzy-MagIC Study
Source: MDPI journal article supplement (doi:10.3390/metabo10030087), 2020-03-01

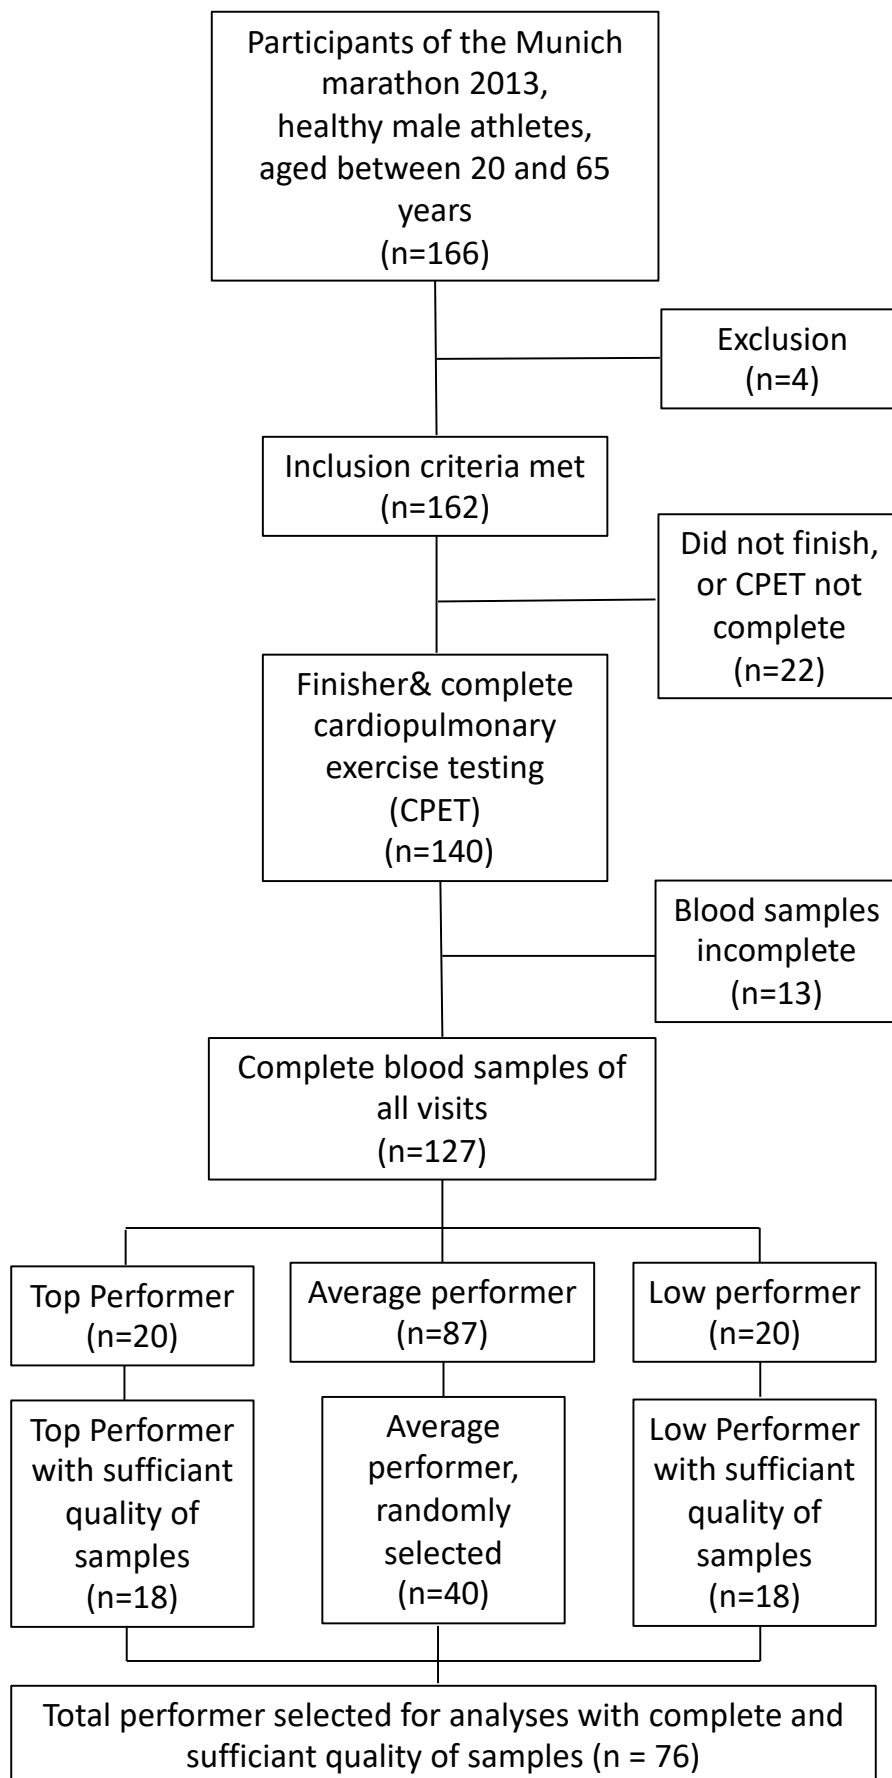

Figure S1: Flow diagram of included study participants

Supplement: s1 [file s1]
